# Supplementary material for: Understanding Barriers: Patient Experience with Immune-mediated rheumatic diseases in Brazilian Public Health
Source: Research Square preprint supplement (doi:10.21203/rs.3.rs-6388972/v1), 2025-06-25
Supplement: Supplementary file 1 [file eb93f0dd07a26e03ff52c7a7.docx]

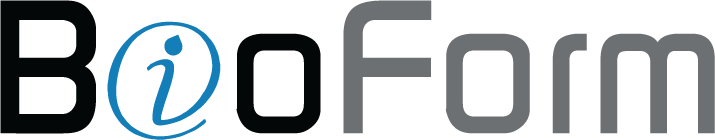

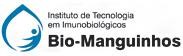


Patient Journey of Individuals with Immune-Mediated Rheumatic Diseases in the State of Rio de Janeiro and Analysis of the Impact of the COVID-19 Pandemic on This Pathway

Treatment Form

How long did it take for you to start specific treatment for your disease from the onset of your symptoms? (In months)

Is your disease treatment provided by the SUS (Brazilian Public Health System)?

Yes

No

I don’t know

How do you access medications for your rheumatic disease?

State pharmacy (RioFarmes) via LME

Pick up at a health center or family clinici

Purchase at a pharmacy

Provided by health insurance

Provided by the hospital where you receive treatment

Through legal action

Other (please specify): _______

Do you use any other therapeutic resources?

Yes

No

If yes, which ones?

Nutritional counseling

Physical therapy

Psychotherapy

Physical activity

Acupuncture

I don’t use these therapies

Other (please specify): _______

If you have used or are using them, how do you access these therapies?

SUS (Public Health System)

Health insurance

Private clinic

Gym

Free public or philanthropic service

Other (please specify): _______

Has your disease worsened due to stopping medication?

Yes

No

I have not stopped the medication

If yes, what led you to stop taking the medication?

Difficulty buying the medication

Difficulty picking it up at the SUS pharmacy

Personal decision

Medical decision

Decisão compartilhada

Side effects

Difficulty administering injectable medication

Loss of regular medical follow-up

Other (please specify): _______

Would you be able to maintain your treatment without assistance from the SUS pharmaceutical services?

Yes

No

I don’t know

Are your medical appointments regular?

Yes

No

If yes, how often do they occur?

Once a month or less

Every 3 months

Every 4 or 5 months

Every 6 months

Once a year

Other (please specify): _______

Are you always seen by the same doctor?

Yes

No

Is the healthcare facility where you receive treatment close to where you live or work?

Yes

No

Do you receive any type of transportation assistance for your treatment?

Yes

No

What is your main feeling regarding your journey to obtain treatment after receiving your diagnosis?

Happy

Welcomed

Safe

Well

Comfortable

Relieved

Suffering

Worried

Lonely

Sad

Hopeful

Other (please specify): _______

Any additional observations?

Yes

Noo

If yes, please describe: _______


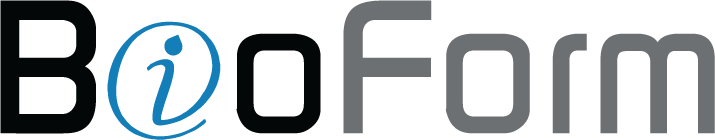

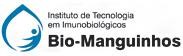


Patient Journey of Individuals with Immune-Mediated Rheumatic Diseases in the State of Rio de Janeiro and Analysis of the Impact of the COVID-19 Pandemic on This Pathway

Clinical Assessment Form

What is your diagnosis?

Juvenile Idiopathic Arthritis

Rheumatoid Arthritis

Psoriatic Arthritis

Ankylosing Spondylitis or other Spondyloarthritis

Scleroderma

Systemic Lupus Erythematosus

Autoimmune Myopathy (Dermatomyositis or Polymyositis)

Sjögren’s Syndrome

Antiphospholipid Antibody Syndrome

Vasculitis

What were your first symptoms?

Pain

Swelling

Fatigue

Fever

Skin rashes

Loss of strength

Weight loss

Hair loss

Mouth ulcers

Fingers changing color in the cold

Urinary symptoms

Pulmonary symptoms

Neurological symptoms

Gastrointestinal symptoms

Thrombotic event

Dryness in the eyes or mouth

Swollen lymph nodes

Other (please specify): _______

What was the first healthcare facility you sought?

Private clinic

Private doctor’s office

Private hospital emergency room

Public hospital emergency room

Health center or family clinic

Outpatient clinic of another specialty in the SUS

UPA (Emergency Care Unit)

Other (please specify): _______

Quanto tempo demorou para que você conseguisse a primeira consulta com o reumatologista? (Em mese

How long did it take for you to get your first rheumatologist appointment? (In months)

Preenchido a partir do dia 20/09/2022

Which medical specialties did you go through before reaching the rheumatologist?

General practitioner at a health center or family clinic

Emergency room doctor

Orthopedist

Occupational health doctor

Other (please specify): _______

I did not go through another medical specialty

Which doctor confirmed your diagnosis?

General practitioner at a health center or family clinic

Emergency room doctor

Orthopedist

SUS rheumatologist

Private rheumatologist

Occupational health doctor

Other (please specify): _______

Quanto tempo levou para que alguém fizesse o seu diagnóstico desde o início dos seus sintomas? (Em

How long did it take for someone to diagnose your condition from the onset of your symptoms? (In months)

In what year did you receive your diagnosis?

Were you living in the state of Rio de Janeiro when you received your diagnosis?

Yes

No

If yes, in which municipality of Rio de Janeiro were you residing at the time?

Were you referred to the rheumatologist through SISREG?

Yes

No

I don’t know

Did you have difficulty undergoing any complementary exams through the SUS?

Yes

No

Not applicable

If yes, which exams were difficult to obtain?

Laboratory tests

Imaging tests

PPD

Other (please specify): _______

Has your diagnosis influenced your personal relationships?

Yes

No

If yes, in what way?

Negatively

Positively

Has your diagnosis affected your work situation?

Yes

No

Not applicable

If yes, how did it affect your work?

Job loss

Frequent temporary leave

Prolonged leave

Retirement

Unable to continue working as a self-employed professional

Other (please specify): _______

Have you ever received or are currently receiving any benefits from the INSS due to your diagnosis?

Yes

No

Prefer not to answer

Regarding the period from the onset of your symptoms until you received your diagnosis, how would you describe how you felt at that time?

Happy

Welcomed

Safe

Well

Comfortable

Suffering

Worried

Lonely

Sad

Hopeful

Any additional observations?

Yes

No

**If yes, please**
